# Supplementary material for: Concise asymmetric total synthesis of catunaregin
Source: Royal Society of Chemistry journal article supplement (doi:10.1039/c6qo00213g), 2016-01-01

## Supporting Information

### Concise Asymmetric Total Synthesis of Catunaregin

Hideki Abe, Takuma Hikichi, Kosuke Emori, Toyoharu Kobayashi,  
and Hisanaka Ito\*

*School of Life Sciences, Tokyo University of Pharmacy and Life Sciences*  
*1432-1 Horinouchi, Hachioji, Tokyo 192-0392, Japan*  
itohisa@toyaku.ac.jp

#### Table of contents

|                                                                                                                 |     |
|-----------------------------------------------------------------------------------------------------------------|-----|
| Experimental procedue .....                                                                                     | S1  |
| Syntheses of ( <i>S</i> )- and ( <i>R</i> )-MTPA esters, and $\Delta\delta$ values of the Mosher's esters ..... | S8  |
| $^1\text{H}$ and $^{13}\text{C}$ NMR spectra of new compounds .....                                             | S10 |

## General

All reactions involving air- and moisture-sensitive reagents were carried out using standard syringe-septumcap techniques. Unless otherwise noted, all solvents and reagents were obtained from commercial suppliers and used without further purification. Routine monitoring of reactions were carried out Merck silica gel 60 F254 TLC plates. Column chromatography was performed on Kanto Chemical Silica Gel 60N (spherical, neutral 60–230  $\mu\text{m}$ ) with the solvents indicated. Melting points were taken on a Yanako MP-S3 micro melting point apparatus and are uncorrected. Measurement of optical rotations was performed with a JASCO P-2200 polarimeter. Infrared spectral measurements were carried out with a Perkin–Elmer Paragon 1000 FT-IR and a JASCO FT/IR-4100 spectrometer, and only noteworthy absorptions were listed.  $^1\text{H}$  and  $^{13}\text{C}$  NMR spectra were measured with a JEOL JNM-ECS400 (400 MHz) or a Burkert AV-600 (600 MHz) spectrometer. Chemical shifts were expressed in ppm using  $\text{CHCl}_3$  (7.26 ppm) for  $^1\text{H}$  NMR and  $\text{CHCl}_3$  (77.0 ppm) for  $^{13}\text{C}$  NMR in  $\text{CDCl}_3$  as an internal standard. HRMS spectra measured on a Micromass LCT spectrometer.

*tert*-Butyl 2-Acetyl-4-oxopentanoate (**S1**).

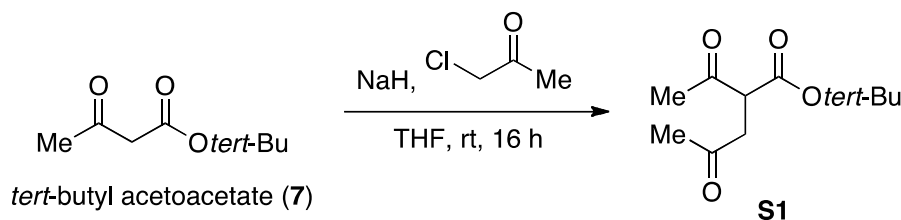

To a stirred suspension of sodium hydride (55% dispersion in mineral oil, 6.58 g, 157 mmol) in tetrahydrofuran (400 mL) was added dropwise *tert*-butyl acetoacetate (**7**) (20.0 mL, 19.1 g, 121 mmol) at 0°C. After stirred for 0.5 h at 0°C, to this reaction mixture was added dropwise  $\alpha$ -chloroacetone (12.5 mL, 14.5 g, 157 mmol) at 0 °C, and then stirred for 96 h at room temperature. The reaction mixture was quenched with 1.0 M HCl aqueous solution (100 mL) at 0 °C, and extracted with ether (2  $\times$  300 mL). The combined organic layers were washed with brine, and the washed solution was dried over  $\text{MgSO}_4$ . The dried solution was filtered and the filtrate was concentrated in vacuo. The resulting residue was purified by column chromatography (hexane–EtOAc, 7:1) to afford the intermediate **S1** (19.5 g, 91.0 mmol, 75%) as a colorless liquid. Those spectra data were identified for those of previous report.

1-*tert*-Butyl 4-methyl 2-acetyl-2-(2-oxopropyl)succinate (**S2**).

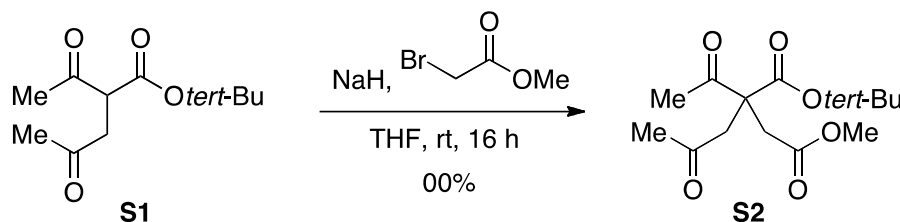

To a stirred suspension of sodium hydride (55% dispersion in mineral oil, 2.88 g, 65.8 mmol) in tetrahydrofuran (170 mL) was added dropwise **S1** (10.9 g, 50.9 mmol) at 0 °C. After stirred for 0.5 h at room temperature, to this mixture was added dropwise methyl bromoacetate (5.30 mL, 8.56 g, 56.0 mmol) at 0 °C, and then stirred for 16 h at room temperature. The reaction mixture was quenched with 1.0 M HCl aqueous solution (80 mL) and extracted with Et<sub>2</sub>O (2 × 200 mL). The combined organic layers were washed with brine, and the washed solution was dried over MgSO<sub>4</sub>. The dried solution was filtered and the filtrate was concentrated in vacuo. The resulting residue was purified by column chromatography (hexane–EtOAc, 4:1) to afford the intermediate **S2** (11.8 g, 41.2 mmol, 81%) as a colorless liquid. Those spectra data were identified for those of previous report.

Methyl 2-(2,5-Dimethylfuran-3-yl)acetate (**8**).

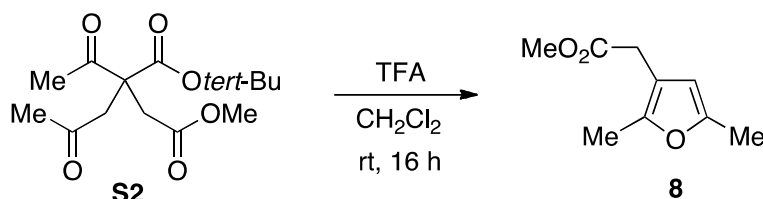

To a stirred solution of **S2** (11.8 g, 41.2 mmol) in CH<sub>2</sub>Cl<sub>2</sub> (140 mL) was added trifluoroacetic acid (24.5 mL, 37.6 g, 330 mmol) at 0 °C. After stirred for 13 h at room temperature, the mixture was concentrated in vacuo. The resulting residue was purified by column chromatography (hexane–EtOAc, 9:1) to afford **8** (4.30 g, 25.6 mmol, 62%) as a pale yellow oil. Those spectra data were identified for those of previous report.

2-(2,5-Dimethylfuran-3-yl)acetic acid (**9**).

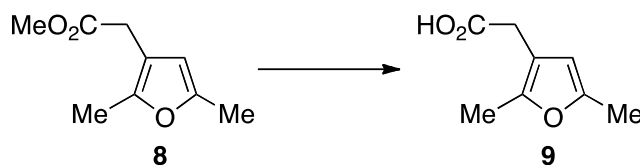

To a stirred solution of **8** (2.99 g, 17.8 mmol) in MeOH (35 mL) were added 3.0 M NaOH aqueous solution (12.5 mL) at room temperature. After stirred for 15 min at same temperature, the reaction was acidified by adding 1.0 M HCl aqueous solution, and extracted with CHCl<sub>3</sub> (3 × 150 mL). The

combined organic layers were washed with brine, dried over  $\text{MgSO}_4$ . The dried solution was filtered, and the filtrate was concentrated in vacuo. The resulting residue was purified by recrystallization (hexane) to afford **9** (2.70 g, 17.5 mmol, 99%) as colorless needles.

$R_f = 0.45$  (hexane–AcOEt–AcOH = 1:1:0.04); Mp: 52–54 °C (hexane); IR (KBr) 3407, 3104, 2985, 2949, 2924, 2676, 1713, 1586, 1434, 1415, 1229, 1099, 991, 926, 800  $\text{cm}^{-1}$ ;  $^1\text{H}$  NMR (400 MHz,  $\text{CDCl}_3$ )  $\delta$  2.20 (3H, s), 2.22 (3H, s), 3.34 (2H, s), 5.88 (1H, s);  $^{13}\text{C}$  NMR (100 MHz,  $\text{CDCl}_3$ )  $\delta$  11.3, 13.4, 30.8, 107.7, 111.4, 147.2, 149.7, 178.2; HRMS (ESI–TOF) calcd for  $\text{C}_8\text{H}_{10}\text{O}_3\text{Na}$  ( $[\text{M} + \text{Na}]^+$ ) 177.0528, found 177.0527; Anal. Calcd for  $\text{C}_8\text{H}_{10}\text{O}_3$ : C, 62.33; H, 6.54. Found: C, 62.20, 6.51.

(*S*)-4-Benzyl-3-[2-(2,5-dimethylfuran-3-yl)acetyl]oxazolidin-2-one (**11**).

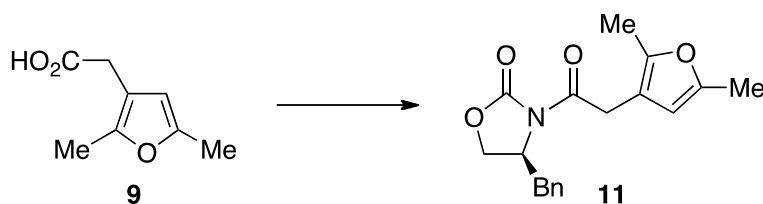

To a stirred solution of **9** (1.75 g, 11.4 mmol) and triethylamine (1.75 mL, 1.26 g, 12.6 mmol) in THF (38 mL) under argon was added dropwise pivaloyl chloride (1.54 mL, 1.51 g, 12.5 mmol) at  $-78$  °C, and the reaction mixture was stirred for 0.5 h at  $0$  °C. To this mixture was added dropwise a solution of lithium (*S*)-4-benzyl-2-oxooxazolidin-3-ide in THF (42 mL), prepared from (*S*)-4-benzyloxazolidin-2-one (2.22 g, 12.5 mmol) and *n*-butyllithium (1.63 M in hexane, 7.69 mL, 12.5 mmol), at  $-78$  °C. After stirred for 1 h at  $0$  °C, the reaction was quenched with saturated  $\text{NH}_4\text{Cl}$  aqueous solution (50 mL), and extracted with AcOEt ( $2 \times 120$  mL). The combined organic layers was washed with brine, dried over  $\text{MgSO}_4$ . The dried solution was filtered, and the filtrate was concentrated in vacuo. The resulting residue was purified by column chromatography (hexane–AcOEt, 4:1) to afford **11** (3.30 g, 10.5 mmol, 93%) as a colorless oil.

$R_f = 0.61$  (hexane–AcOEt = 2:1);  $[\alpha]_D^{25} +56.4$  ( $c$  1.00,  $\text{CHCl}_3$ ); IR (neat) 3029, 2981, 2921, 1781, 1701, 1584, 1454, 1390, 1356, 1211, 1197, 1111, 1052, 994, 762, 747, 703  $\text{cm}^{-1}$ ;  $^1\text{H}$  NMR (400 MHz,  $\text{CDCl}_3$ )  $\delta$  2.23 (3H, s), 2.24 (3H, s), 2.77 (1H, dd,  $J = 13.3, 9.6$  Hz), 3.29 (1H, dd,  $J = 13.3, 3.2$  Hz), 3.94 and 4.01 (2H, ABq,  $J = 17.0$  Hz), 4.18 (1H, A part of ABX,  $J = 9.2, 3.2$  Hz), 4.22 (1H, B part of ABX,  $J = 9.2, 7.6$  Hz), 4.64–4.70 (1H, m), 5.92 (1H, s), 7.16–7.19 (2H, m), 7.24–7.34 (3H, m);  $^{13}\text{C}$  NMR (100 MHz,  $\text{CDCl}_3$ )  $\delta$  11.5, 13.4, 31.9, 37.7, 55.2, 66.1, 107.9, 111.4, 127.3, 128.9 (2C), 129.4 (2C), 135.1, 147.5, 149.6, 153.4, 171.0; HRMS (ESI–TOF) calcd for  $\text{C}_{18}\text{H}_{19}\text{NO}_4\text{Na}$  ( $[\text{M} + \text{Na}]^+$ ) 336.1212, found 336.1208.

4-[(1*S*,2*S*)-3-((*S*)-4-Benzyl-2-oxooxazolidin-3-yl)-2-(2,5-dimethylfuran-3-yl)-1-hydroxy-3-oxopropyl]-2-methoxyphenyl 2-nitrobenzenesulfonate (**13**).

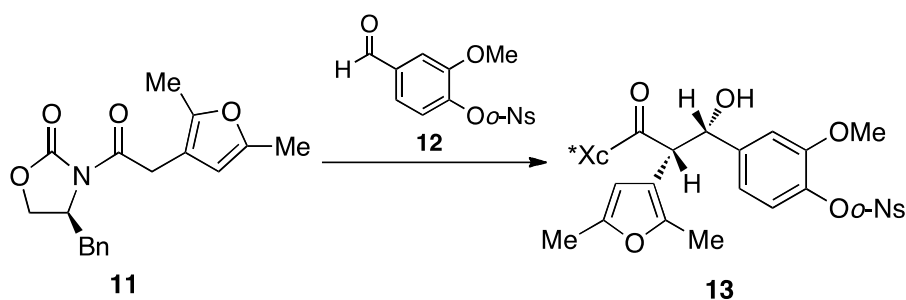

To a stirred solution of **11** (1.31 g, 4.18 mmol) in  $\text{CH}_2\text{Cl}_2$  (14 mL) were added dropwise *N,N*-diisopropylethylamine (0.981 mL, 0.728 g, 5.63 mmol), and di-*n*-butylboryl trifluoromethanesulfonate (1.0 M in  $\text{CH}_2\text{Cl}_2$ , 4.74 mL, 4.74 mmol) at 0 °C. After stirred for 45 min at 0 °C, to this mixture was added dropwise a solution of *O*-*o*-Ns-vanillin **12** (1.00 g, 2.96 mmol) in  $\text{CH}_2\text{Cl}_2$  (10 mL) at –78 °C. After stirred for 2.5 h at –78 °C, the reaction was quenched with MeOH (40 mL) and saturated  $\text{NH}_4\text{Cl}$  aqueous solution (40 mL) at –78 °C, and extracted with  $\text{CHCl}_3$  (2 × 200 mL). The combined organic layers were washed with brine, and the washed solution was dried over  $\text{Na}_2\text{SO}_4$ . The dried solution was filtered, and the filtrate was concentrated in vacuo. The resulting residue was purified by column chromatography (hexane–AcOEt, 2:1) to afford **13** (1.89 g, 2.90 mmol, 98%) as a colorless oil.

$R_f$  = 0.26 (hexane–AcOEt = 2:1);  $[\alpha]_D^{25} +4.7$  ( $c$  1.00,  $\text{CHCl}_3$ ); IR (neat) 3502, 3088, 2921, 2850, 1774, 1690, 1604, 1545, 1501, 1385, 1364, 1272, 1199, 1111, 1031, 864, 852, 760  $\text{cm}^{-1}$ ;  $^1\text{H}$  NMR (400 MHz,  $\text{CDCl}_3$ )  $\delta$  2.04 (3H, s), 2.26 (3H, s), 2.67 (1H, dd,  $J$  = 13.6, 9.2 Hz), 2.90–3.06 (1H, br s), 3.09 (1H, dd,  $J$  = 13.6, 3.2 Hz), 3.49 (3H, s), 4.02–4.12 (2H, m), 4.53–4.60 (1H, m), 5.15 (1H, d,  $J$  = 6.8 Hz), 5.18 (1H, d,  $J$  = 6.8 Hz), 6.13 (1H, s), 6.84–6.91 (2H, m); 7.01–7.08 (2H, m); 7.11 (1H, d,  $J$  = 8.4 Hz), 7.22–7.29 (3H, m); 7.68–7.75 (1H, m); 7.76–7.85 (2H, m); 8.00–8.05 (1H, m);  $^{13}\text{C}$  NMR (100 MHz,  $\text{CDCl}_3$ )  $\delta$  11.3, 13.5, 37.3, 47.6, 54.7, 55.5, 65.8, 74.2, 106.4, 111.3, 112.1, 119.2, 123.7, 124.5, 127.3, 128.8 (2C), 129.4 (2C), 129.9, 131.6, 131.8, 134.6, 134.9, 137.7, 141.5, 148.3, 150.1, 150.2, 151.2, 152.7, 172.7; HRMS (ESI–TOF) calcd for  $\text{C}_{32}\text{H}_{30}\text{N}_2\text{O}_{11}\text{SNa}$  ( $[\text{M} + \text{Na}]^+$ ) 673.1468, found 673.1465.

4-[(1*S*,2*S*)-3-((*S*)-4-Benzyl-2-oxooxazolidin-3-yl)-2-(2,5-dimethylfuran-3-yl)-3-oxo-1-(triethylsilyloxy)propyl]-2-methoxyphenyl 2-nitrobenzenesulfonate (**S3**).

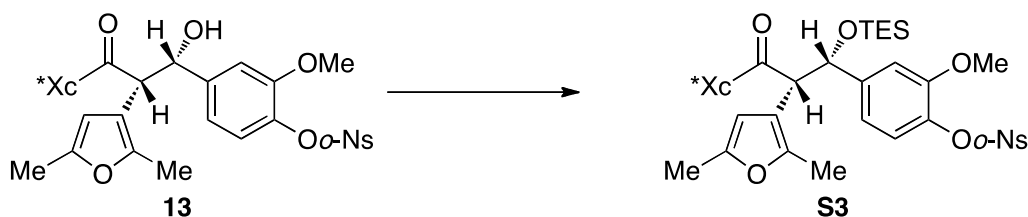

To a stirred solution of **13** (500 mg, 0.768 mmol) in  $\text{CH}_2\text{Cl}_2$  (4 mL) were added dropwise 1,8-diazabicyclo[5.4.0]undec-7-ene (0.689 mL, 703 mg, 4.62 mmol), and triethylsilyl

trifluoromethanesulfonate (0.434 mL, 508 mg, 1.92 mmol) at  $-78\text{ }^{\circ}\text{C}$  under argon, and the mixture was stirred for 20 h at  $-50\text{ }^{\circ}\text{C}$ . The reaction was quenched with saturated  $\text{NH}_4\text{Cl}$  aqueous solution (5 mL), and extracted with  $\text{CHCl}_3$  ( $3 \times 20\text{ mL}$ ). The combined organic layers were washed with brine, dried over  $\text{Na}_2\text{SO}_4$ . The dried solution was filtered, and the filtrate was concentrated in vacuo. The resulting residue was purified by column chromatography (hexane–AcOEt, 2:1) to afford **S3** (527 mg, 0.689 mmol, 90%) as a colorless gum.

$R_f = 0.45$  (hexane–AcOEt– $\text{Et}_2\text{O} = 2:1:1$ );  $[\alpha]_{\text{D}}^{25} +10.9$  ( $c\ 1.00$ ,  $\text{CHCl}_3$ ); IR (neat) 3028, 2955, 2915, 2876, 2360, 2341, 1776, 1696, 1604, 1548, 1501, 1389, 1281, 1201, 1111, 1004, 891, 859, 655, 591  $\text{cm}^{-1}$ ;  $^1\text{H}$  NMR (400 MHz,  $\text{CDCl}_3$ )  $\delta$  0.34 (6H, q,  $J = 7.9\text{ Hz}$ ), 0.71 (9H, t,  $J = 7.9\text{ Hz}$ ), 2.21 (3H, s), 2.25 (3H, s), 2.65 (1H, dd,  $J = 13.5, 8.9\text{ Hz}$ ), 3.06 (1H, dd,  $J = 13.5, 3.0\text{ Hz}$ ), 3.50 (3H, s), 3.92–4.03 (2H, m), 4.36–4.42 (1H, m), 5.00 (1H, d,  $J = 8.2\text{ Hz}$ ), 5.25 (1H, d,  $J = 8.2\text{ Hz}$ ), 6.20 (1H, s), 6.88 (1H, dd,  $J = 8.2, 1.8\text{ Hz}$ ), 6.99 (1H, d,  $J = 1.4\text{ Hz}$ ), 7.01–7.11 (3H, m), 7.20–7.30 (3H, m), 7.67–7.75 (1H, m), 7.77–7.84 (2H, m), 8.01 (1H, d,  $J = 8.2\text{ Hz}$ );  $^{13}\text{C}$  NMR (100 MHz,  $\text{CDCl}_3$ )  $\delta$  4.5 (3C), 6.4 (3C), 11.6, 13.5, 37.3, 49.0, 54.9, 55.6, 65.6, 75.9, 106.7, 111.3, 114.4, 119.4, 123.4, 124.4, 127.2, 128.7 (2C), 129.4 (2C), 129.8, 131.5, 131.7, 134.87, 134.89, 137.4, 144.0, 148.4, 149.2, 149.3, 151.1, 152.9, 171.5; HRMS (ESI–TOF) calcd for  $\text{C}_{38}\text{H}_{44}\text{N}_2\text{O}_{11}\text{SSiNa}$  ( $[\text{M} + \text{Na}]^+$ ) 787.2333, found 787.2331.

4-[(1*S*,2*R*)-2-(2,5-dimethylfuran-3-yl)-3-hydroxy-1-(triethylsilyloxy)propyl]-2-methoxyphenyl 2-nitrobenzenesulfonate (**15**).

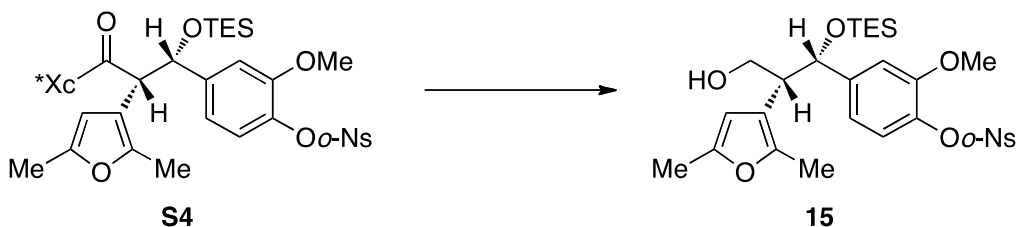

To a stirred suspension of lithium chloride (108 mg, 2.54 mmol) in THF (5 mL) were added sodium borohydride (95.9 mg, 2.54 mmol) at room temperature, and the mixture was stirred for 0.5 h at  $40\text{ }^{\circ}\text{C}$ . To this mixture was added dropwise a solution of **S4** (194 mg, 0.254 mmol) in THF (2.5 mL) at  $40\text{ }^{\circ}\text{C}$ , and the mixture was stirred for 25 h at  $50\text{ }^{\circ}\text{C}$ . The reaction was quenched with saturated  $\text{NH}_4\text{Cl}$  aqueous solution (5 mL), and extracted with  $\text{CHCl}_3$  ( $3 \times 20\text{ mL}$ ). The combined organic layers were washed with brine, dried over  $\text{Na}_2\text{SO}_4$ . The dried solution was filtered, and the filtrate was concentrated in vacuo. The resulting residue was purified by column chromatography (hexane–AcOEt, 2:1) to afford **15** (117 mg, 0.198 mmol, 78%) as colorless oil.

$R_f = 0.50$  (hexane–AcOEt = 1:2);  $[\alpha]_{\text{D}}^{25} -27.0$  ( $c\ 0.3$ ,  $\text{CHCl}_3$ ); IR (neat) 3582, 3419, 3098, 2955, 2914, 2877, 1732, 1604, 1548, 1500, 1464, 1417, 1387, 1282, 1266, 1200, 1148, 1111, 1007, 866, 851, 761, 741, 591  $\text{cm}^{-1}$ ;  $^1\text{H}$  NMR (400 MHz,  $\text{CDCl}_3$ )  $\delta$  0.41–0.55 (6H, m), 0.82–0.87 (9H, m),

1.72 (3H, s), 1.79 (1H, br s), 2.18 (3H, s), 2.77 (1H, ddd,  $J = 7.3, 7.3, 3.7$  Hz), 3.38 (3H, s), 3.70 (1H, dd,  $J = 10.5, 7.3$  Hz), 3.84 (1H, dd,  $J = 10.5, 7.3$  Hz), 4.93 (1H, d,  $J = 3.7$  Hz), 5.77 (1H, s), 6.55 (1H, d,  $J = 1.8$  Hz), 6.69 (1H, dd,  $J = 8.2, 1.8$  Hz), 7.07 (1H, dd,  $J = 8.2$  Hz), 7.65–7.70 (1H, m), 7.78–7.86 (2H, m), 7.94–7.97 (1H, m);  $^{13}\text{C}$  NMR (100 MHz,  $\text{CDCl}_3$ )  $\delta$  4.65 (3C), 6.67 (3C), 10.9, 13.4, 46.9, 55.3, 63.7, 74.9, 106.8, 111.3, 115.1, 118.4, 123.3, 124.6, 130.0, 131.6 (2C), 134.7, 137.1, 144.2, 148.0, 148.5, 148.8, 150.7; HRMS (ESI-TOF) calcd for  $\text{C}_{28}\text{H}_{37}\text{NO}_9\text{SSiNa}$  ( $[\text{M} + \text{Na}]^+$ ) 614.1856, found 614.1860.

4-[(1*R*,3*S*,3*aR*,6*S*,7*aR*)-1,6-Dimethylhexahydro-1*H*-1,6-epoxyfuro[3,4-*c*]pyran-3-yl]-2-methoxyphenyl 2-nitrobenzenesulfonate (**16**).

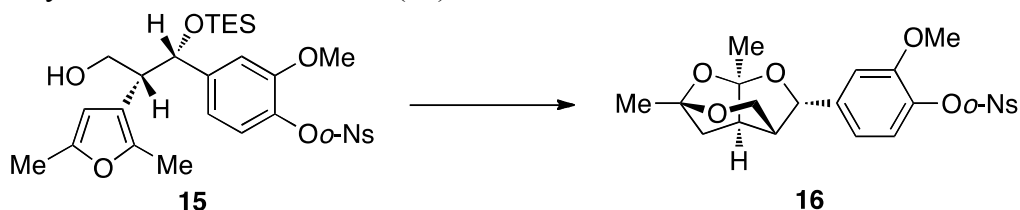

To a stirred solution of **15** (74.0 mg, 0.125 mmol) in THF (1 mL) was added concentrated  $\text{H}_2\text{SO}_4$  (0.200 mL) at room temperature under argon, and the mixture was stirred for 8 h at the same temperature. The reaction was carefully poured into saturated  $\text{NaHCO}_3$  aqueous solution, and extracted with  $\text{CHCl}_3$  ( $3 \times 30$  mL). The combined organic layers were washed with brine, dried over  $\text{MgSO}_4$ . The dried solution was filtered, and the filtrate was concentrated in vacuo. The resulting residue was purified by column chromatography (hexane–AcOEt, 1:3) to afford **16** (37.0 mg, 0.0775 mmol, 62%) as a colorless oil, and diol **14** (2.2 mg, 0.00461 mmol, 4%) as a colorless oil.

#### Data of **16**

$R_f = 0.57$  (hexane–AcOEt = 1:9);  $[\alpha]_{\text{D}}^{25} +33.3$  ( $c$  0.55,  $\text{CHCl}_3$ ); IR (neat) 3502, 3096, 2985, 2936, 2879, 2360, 2341, 1732, 1604, 1546, 1505, 1465, 1453, 1385, 1274, 1200, 1166, 1112, 1059, 1032, 942, 896, 852, 758, 592  $\text{cm}^{-1}$ ;  $^1\text{H}$  NMR (400 MHz,  $\text{CDCl}_3$ )  $\delta$  1.48 (3H, s), 1.60 (3H, s), 1.88 (1H, dd,  $J = 12.4, 4.1$  Hz), 2.26 (1H, d,  $J = 12.4$  Hz), 2.45–2.50 (1H, m), 2.68 (1H, dd,  $J = 10.1, 3.7$  Hz), 3.57 (3H, s), 3.75–3.78 (2H, m), 4.98 (1H, d,  $J = 3.7$  Hz), 6.82–6.86 (2H, m), 7.15 (1H, d,  $J = 8.7$  Hz), 7.68–7.74 (1H, m), 7.79–7.84 (1H, m), 7.85–7.88 (1H, m), 8.03 (1H, d,  $J = 7.8$  Hz);  $^{13}\text{C}$  NMR (100 MHz,  $\text{CDCl}_3$ )  $\delta$  22.5, 24.7, 33.2, 45.5, 48.0, 55.6, 63.0, 84.6, 106.1, 110.2, 115.5, 117.8, 124.3, 124.7, 130.2, 131.6, 131.9, 134.8, 137.5, 143.5, 148.4, 151.5; HRMS (ESI-TOF) calcd for  $\text{C}_{22}\text{H}_{23}\text{NO}_9\text{SNa}$  ( $[\text{M} + \text{Na}]^+$ ) 500.0991, found 500.0994.

#### Data of diol **14**

$R_f = 0.56$  (hexane–AcOEt = 1:19);  $[\alpha]_{\text{D}}^{25} -20.2$  ( $c$  0.27,  $\text{CHCl}_3$ ); IR (neat) 3558, 3399, 3099, 3008, 2921, 1717, 1604, 1546, 1502, 1465, 1419, 1384, 1271, 1199, 1175, 1110, 1059, 1031, 864, 853,

765  $\text{cm}^{-1}$ ;  $^1\text{H}$  NMR (400 MHz,  $\text{CDCl}_3$ )  $\delta$  1.52–1.70 (1H, br s), 1.87 (3H, s), 2.23 (3H, s), 2.34–2.42 (1H, br s), 2.80–2.86 (1H, m), 3.49 (3H, s), 3.72–3.76 (2H, m), 4.92 (1H, d,  $J = 5.0$  Hz), 5.95 (1H, s), 6.74 (1H, s), 6.80 (1H, dd,  $J = 8.7, 1.4$  Hz), 7.13 (1H, d,  $J = 8.2$  Hz), 7.71 (1H, ddd,  $J = 8.2, 7.8, 1.4$  Hz), 7.81 (1H, ddd,  $J = 8.2, 7.8, 1.4$  Hz), 7.86 (1H, dd,  $J = 8.2, 1.4$  Hz), 8.02 (1H, dd,  $J = 8.2, 1.4$  Hz);  $^{13}\text{C}$  NMR (100 MHz,  $\text{CDCl}_3$ )  $\delta$  11.2, 13.5, 46.3, 55.9, 64.0, 74.4, 106.0, 111.0, 114.8, 118.6, 123.7, 124.7, 130.2, 131.6, 131.8, 134.8, 137.5, 143.4, 148.4, 148.5, 150.1, 151.2; HRMS (ESI–TOF) calcd for  $\text{C}_{22}\text{H}_{23}\text{NO}_9\text{SNa}$  ( $[\text{M} + \text{Na}]^+$ ) 500.0991, found 500.0987.

4-[(1*R*,3*S*,3*aR*,6*S*,7*aR*)-1,6-dimethylhexahydro-1*H*-1,6-epoxyfuro[3,4-*c*]pyran-3-yl]-2-methoxyphenol [catunaregin (**1**)].

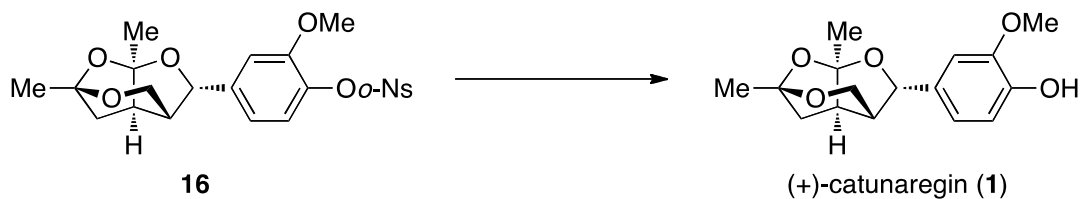

To a stirred solution of **16** (37.0 mg, 0.0775 mmol) and cesium carbonate (126 mg, 0.387 mmol) in  $\text{CH}_3\text{CN}$  (1 mL) was added dropwise thiophenol (23.8  $\mu\text{L}$ , 25.6 mg, 0.0232 mmol) at 0  $^\circ\text{C}$ , and the mixture was stirred for 2 h at room temperature. The reaction was quenched with saturated  $\text{NH}_4\text{Cl}$  aqueous solution, and the mixture was extracted with  $\text{AcOEt}$  ( $2 \times 30$  mL). The combined organic layers were washed with brine, dried over  $\text{MgSO}_4$ . The dried solution was filtered, and the filtrate was concentrated in vacuo. The resulting residue was purified by column chromatography (hexane– $\text{AcOEt}$ , 1:9) to afford **1** (22.6 mg, 0.0773 mmol, 100%) as a colorless oil.

$R_f = 0.67$  (hexane– $\text{AcOEt} = 1:9$ );  $[\alpha]_{\text{D}}^{25} +38.5$  ( $c$  0.350,  $\text{MeOH}$ );  $[\alpha]_{\text{D}}^{24} +40.3$  ( $c$  0.405,  $\text{CHCl}_3$ ); IR (neat) 3408, 2984, 2937, 2879, 1608, 1603, 1517, 1460, 1450, 1432, 1385, 1331, 1270, 1238, 1195, 1170, 1113, 1057, 1032, 942, 847, 819, 794, 762  $\text{cm}^{-1}$ ;  $^1\text{H}$  NMR (400 MHz,  $\text{CDCl}_3$ )  $\delta$  1.49 (3H, s), 1.60 (3H, s), 1.88 (1H, dd,  $J = 12.3, 3.7$  Hz), 2.26 (1H, d,  $J = 12.3$  Hz), 2.46–2.52 (1H, m), 2.71 (1H, dd,  $J = 10.1, 3.7$  Hz), 3.73–3.78 (2H, m), 3.91 (3H, s), 4.95 (1H, d,  $J = 4.1$  Hz), 5.60 (1H, s), 6.77–6.83 (2H, m), 6.86–6.90 (1H, m);  $^{13}\text{C}$  NMR (100 MHz,  $\text{CDCl}_3$ )  $\delta$  22.6, 24.8, 33.3, 45.7, 47.8, 55.9, 62.9, 85.3, 105.9, 108.6, 114.4, 115.3, 118.8, 134.4, 145.2, 146.5; HRMS (ESI–TOF) calcd for  $\text{C}_{16}\text{H}_{20}\text{O}_5\text{Na}$  ( $[\text{M} + \text{Na}]^+$ ) 315.1208, found 315.1201.



## Syntheses of (*S*)- and (*R*)-MTPA esters, and $\Delta\delta$ values of the Mosher's esters.

(*S*)-(1*S*,2*S*)-3-[(*S*)-4-Benzyl-2-oxooxazolidin-3-yl]-2-(2,5-dimethylfuran-3-yl)-1-[3-methoxy-4-(2-nitrophenylsulfonyloxy)phenyl]-3-oxopropyl 3,3,3-Trifluoro-2-methoxy-2-phenylpropanoate (**S4a**).

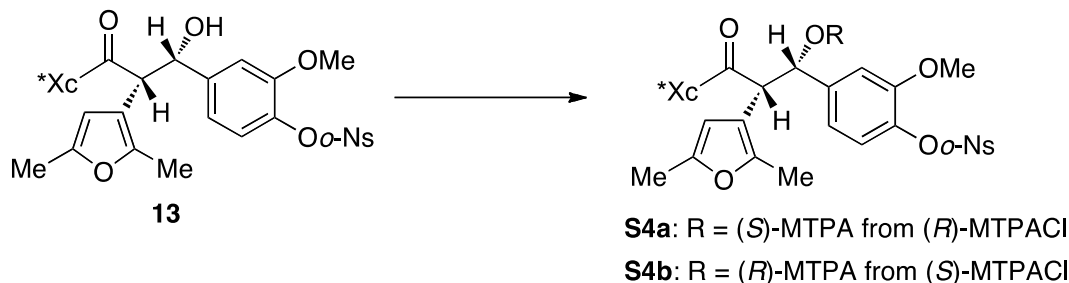

To a stirred solution of **13** (50.0 mg, 0.0768 mmol) in  $\text{CH}_2\text{Cl}_2$  (1 mL) was added pyridine (31.0  $\mu\text{L}$ , 30.4 mg, 0.384 mmol), and (*R*)-(-)- $\alpha$ -methoxy- $\alpha$ -trifluoromethylphenylacetyl chloride (28.8  $\mu\text{L}$ , 38.8 mg, 0.154 mmol) in 0 °C. After stirred for 5 h at room temperature, the reaction was quenched with saturated  $\text{NH}_4\text{Cl}$  aqueous solution (3 mL), and extracted with  $\text{CHCl}_3$  ( $3 \times 10$  mL). The combined organic layers were washed with brine, dried over  $\text{Na}_2\text{SO}_4$ . The dried solution was filtered, and the filtrate was concentrated in vacuo. The resulting residue was purified by column chromatography (hexane–AcOEt, 2:1) to afford **S4a** (51.4 mg, 59.3  $\mu\text{mol}$ , 77%) as colorless amorphous solid.

$R_f$  = 0.56 (hexane–AcOEt = 1:1);  $[\alpha]_{\text{D}}^{20}$  –12.5 ( $c$  0.34,  $\text{CHCl}_3$ ); IR (neat) 3430, 3027, 2950, 2922, 2849, 1774, 1752, 1696, 1638, 1606, 1546, 1502, 1452, 1389, 1362, 1271, 1255, 1201, 1182, 1113, 1022, 999, 863, 851, 760, 717  $\text{cm}^{-1}$ ;  $^1\text{H}$  NMR (600 MHz,  $\text{CDCl}_3$ )  $\delta$  1.93 (3H, s), 2.25 (3H, s), 2.68 (1H, dd,  $J$  = 13.6, 8.3 Hz), 2.95 (1H, dd,  $J$  = 13.6, 3.4 Hz), 3.26 (3H, m), 3.54 (3H, s), 4.02 (1H, A part of ABX,  $J$  = 9.0, 3.6 Hz), 4.08 (1H, B part of ABX,  $J$  = 9.0, 8.4 Hz), 4.46–4.52 (1H, m), 5.65 (1H, d,  $J$  = 10.0 Hz), 6.10 (1H, s), 6.49 (1H, d,  $J$  = 10.0 Hz), 6.92–6.97 (2H, m), 7.02 (1H, d,  $J$  = 1.9 Hz), 7.07 (1H, dd,  $J$  = 8.4, 1.8 Hz), 7.14–7.19 (3H, m), 7.20–7.23 (3H, m), 7.27–7.29 (2H, m), 7.35–7.39 (1H, m), 7.72–7.79 (2H, m), 7.80–7.84 (1H, m), 8.09 (1H, d,  $J$  = 7.9 Hz);  $^{13}\text{C}$  NMR (150 MHz,  $\text{CDCl}_3$ )  $\delta$  11.2, 13.6, 37.1, 45.1, 54.5, 55.3, 55.7, 65.7, 77.04, 84.3 (q,  $J$  = 27.5 Hz), 105.8, 112.56, 112.64, 120.5, 123.2 (q,  $J$  = 288.7 Hz), 124.3, 124.4, 126.9 (2C), 127.3, 128.2 (2C), 128.7 (2C), 129.36, 129.42 (2C), 129.9, 131.5, 131.8, 132.0, 134.4, 135.0, 137.7, 138.4, 148.4, 149.9, 150.1, 151.6, 152.9, 165.5, 170.1; HRMS (ESI–TOF) calcd for  $\text{C}_{42}\text{H}_{37}\text{F}_3\text{N}_2\text{O}_{13}\text{SNa}$  ( $[\text{M} + \text{Na}]^+$ ) 889.1866, found 889.1856.

(*R*)-(1*S*,2*S*)-3-((*S*)-4-benzyl-2-oxooxazolidin-3-yl)-2-(2,5-dimethylfuran-3-yl)-1-(3-methoxy-4-(((2-nitrophenyl)sulfonyl)oxy)phenyl)-3-oxopropyl 3,3,3-trifluoro-2-methoxy-2-phenylpropanoate (**S4b**).

To a stirred solution of **13** (50.0 mg, 0.0768 mmol) in  $\text{CH}_2\text{Cl}_2$  (1 mL) was added pyridine (31.0  $\mu\text{L}$ ,

30.4 mg, 0.384 mmol), and (*S*)-(+)- $\alpha$ -methoxy- $\alpha$ -trifluoromethylphenylacetyl chloride (28.8  $\mu$ L, 38.8 mg, 0.154 mmol) in 0 °C. After stirred for 5 h at room temperature, the reaction was quenched with saturated  $\text{NH}_4\text{Cl}$  aqueous solution (3 mL), and extracted with  $\text{CHCl}_3$  ( $3 \times 10$  mL). The combined organic layers were washed with brine, dried over  $\text{Na}_2\text{SO}_4$ . The dried solution was filtered, and the filtrate was concentrated in vacuo. The resulting residue was purified by column chromatography (hexane–AcOEt, 2:1) to afford **S4b** (61.9x mg, 71.4 mmol, 93%) as colorless amorphous solid.

$R_f = 0.63$  (hexane–AcOEt = 1:1);  $[\alpha]_D^{20} +16.8$  ( $c$  0.62,  $\text{CHCl}_3$ ); IR (neat) 3432, 3026, 2950, 2923, 2850, 1775, 1753, 1696, 1637, 1606, 1546, 1502, 1452, 1389, 1365, 1270, 1255, 1202, 1182, 1113, 1030, 1000, 864, 851, 760  $\text{cm}^{-1}$ ;  $^1\text{H}$  NMR (600 MHz,  $\text{CDCl}_3$ )  $\delta$  2.18 (3H, s), 2.28 (3H, s), 2.69 (1H, dd,  $J = 13.6, 8.3$  Hz), 2.98 (1H, dd,  $J = 13.6, 3.2$  Hz), 3.26 (3H, m), 3.41 (3H, s), 4.00 (1H, A part of ABX,  $J = 9.1, 3.0$  Hz), 4.05 (1H, B part of ABX,  $J = 9.1, 8.3$  Hz), 4.46–4.51 (1H, m), 5.66 (1H, d,  $J = 10.2$  Hz), 6.20 (1H, s), 6.34 (1H, d,  $J = 10.2$  Hz), 6.82 (1H, d,  $J = 1.9$  Hz), 6.94–6.99 (3H, m), 7.06–7.12 (3H, m), 7.21–7.27 (5H, m), 7.33–7.37 (1H, m), 7.73–7.77 (2H, m), 7.80–7.84 (1H, m), 8.08–8.11 (1H, m);  $^{13}\text{C}$  NMR (150 MHz,  $\text{CDCl}_3$ )  $\delta$  11.5, 13.6, 37.1, 45.3, 54.5, 55.1, 55.5, 65.7, 77.9, 84.5 (q,  $J = 27.5$  Hz), 105.7, 112.0, 113.4, 120.7, 123.2 (q,  $J = 288.7$  Hz), 124.1, 124.4, 127.1 (2C), 127.3, 128.2 (2C), 128.8 (2C), 129.4 (2C), 129.5, 129.9, 131.6, 131.81, 131.84, 134.5, 134.9, 137.5, 138.3, 148.4, 150.1, 150.3, 151.4, 152.8, 165.3, 170.1; HRMS (ESI–TOF) calcd for  $\text{C}_{42}\text{H}_{37}\text{F}_3\text{N}_2\text{O}_{13}\text{SNa}$  ( $[\text{M} + \text{Na}]^+$ ) 889.1866, found 889.1863.

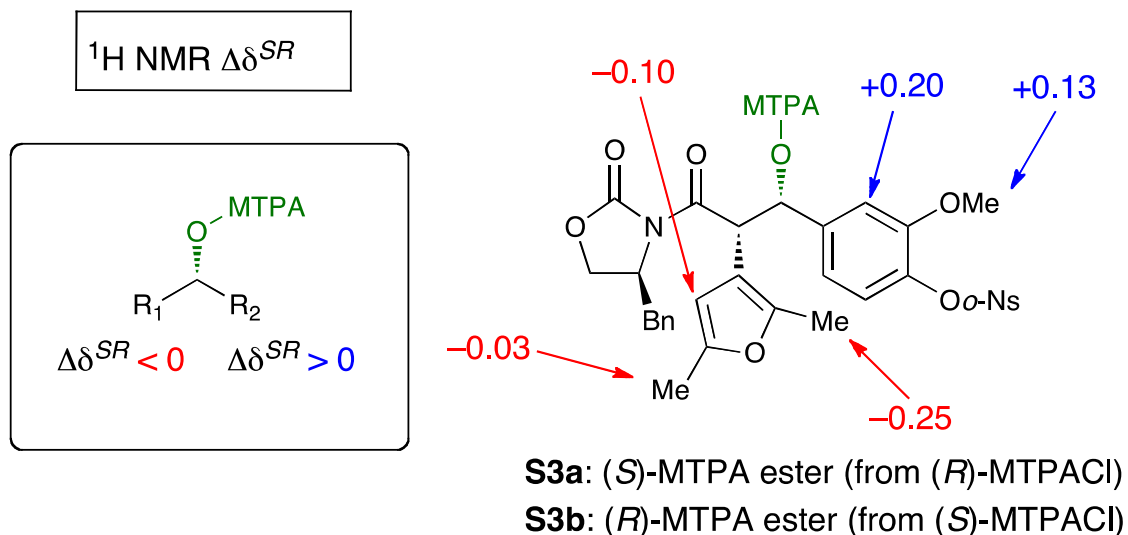





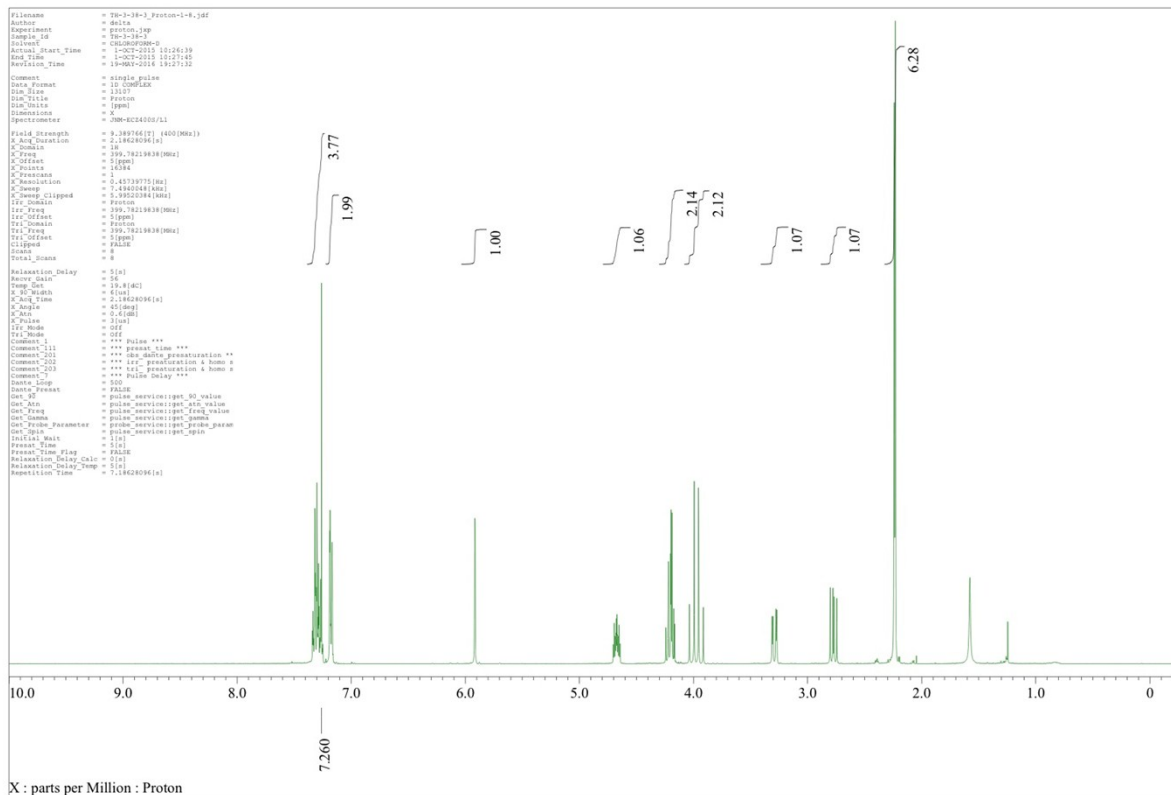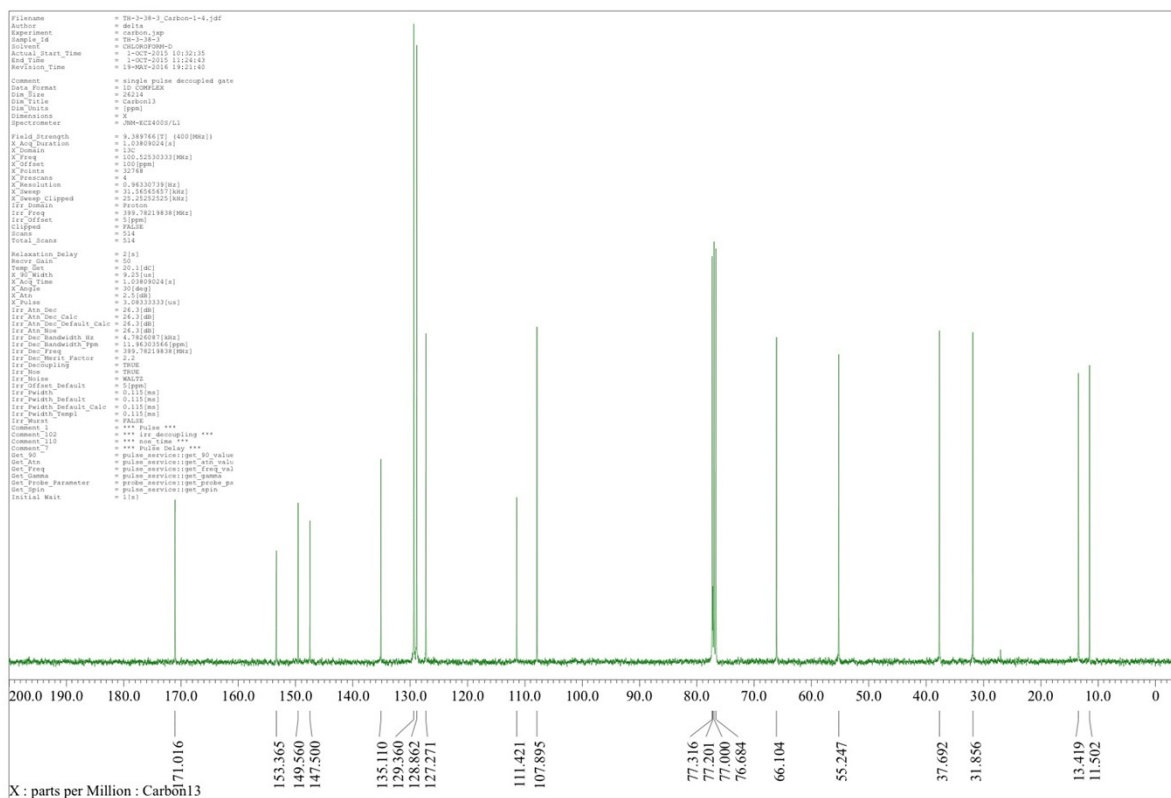



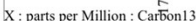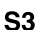







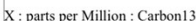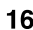







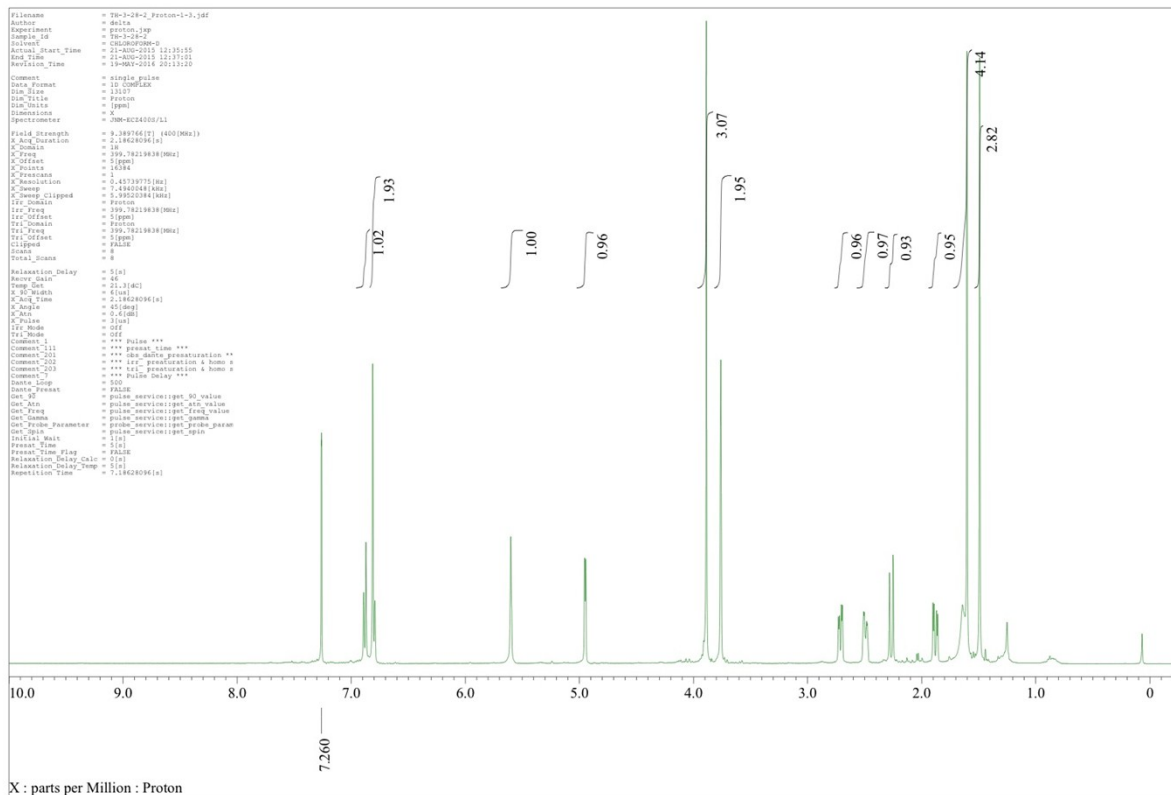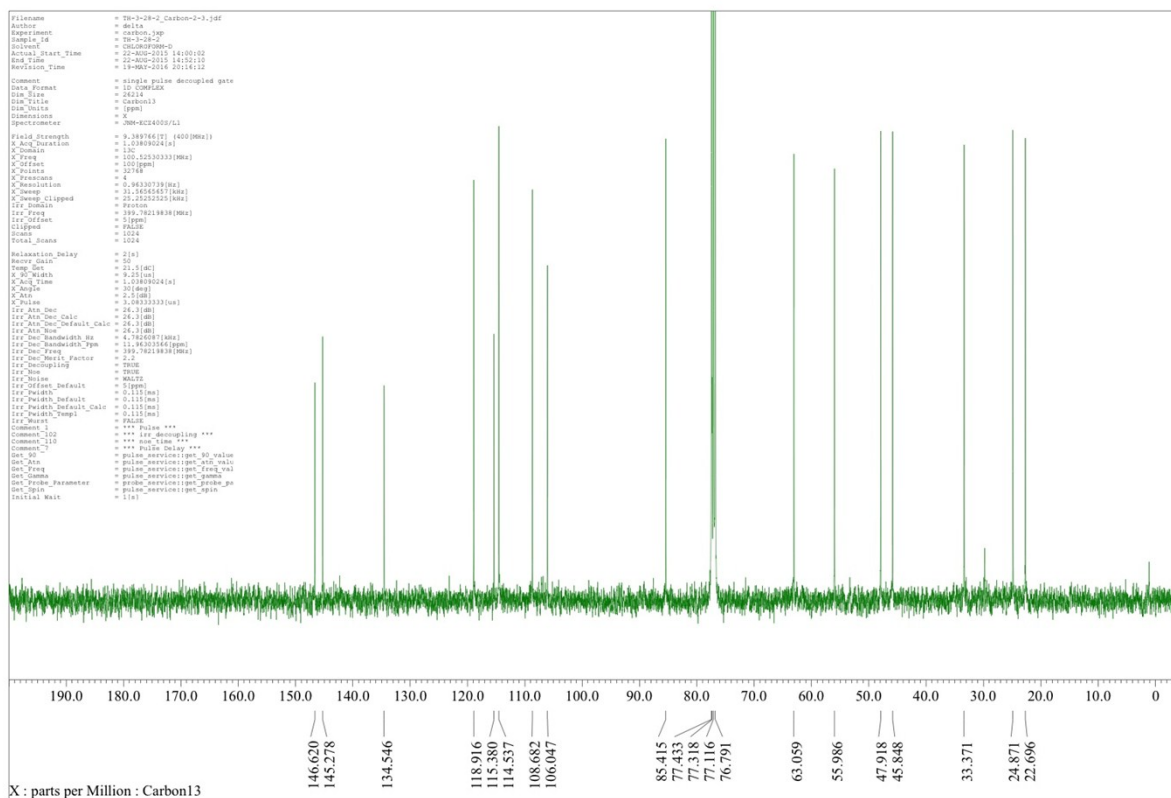

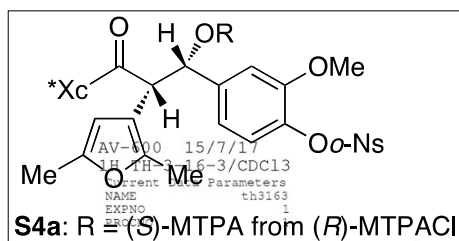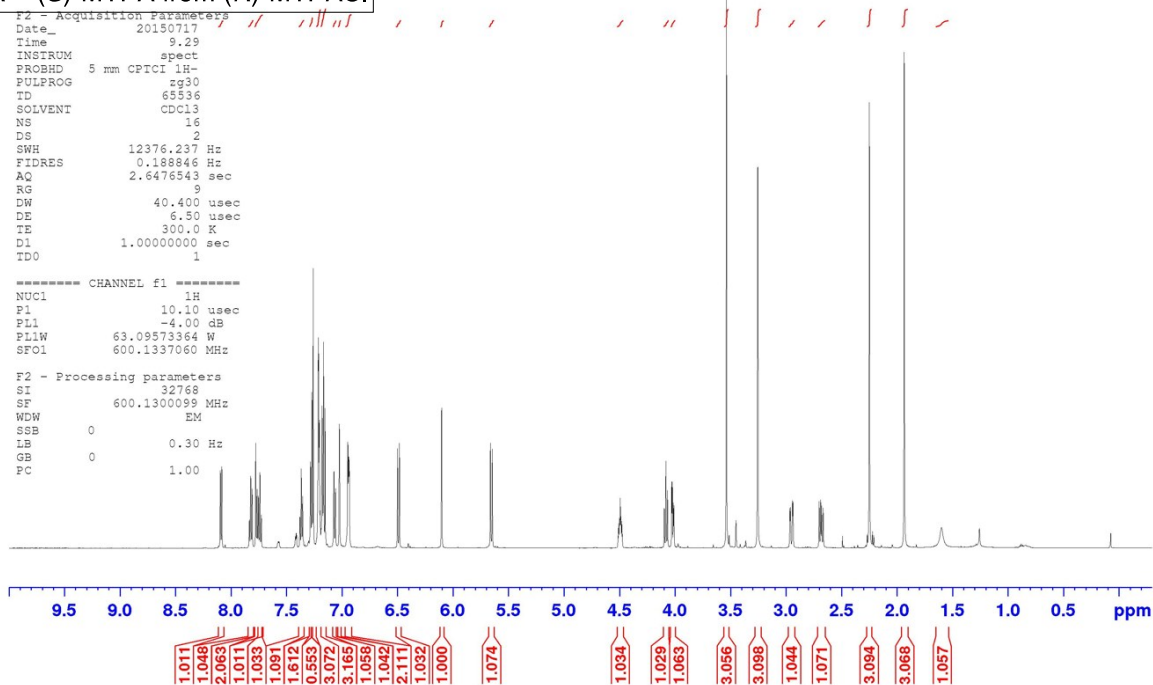

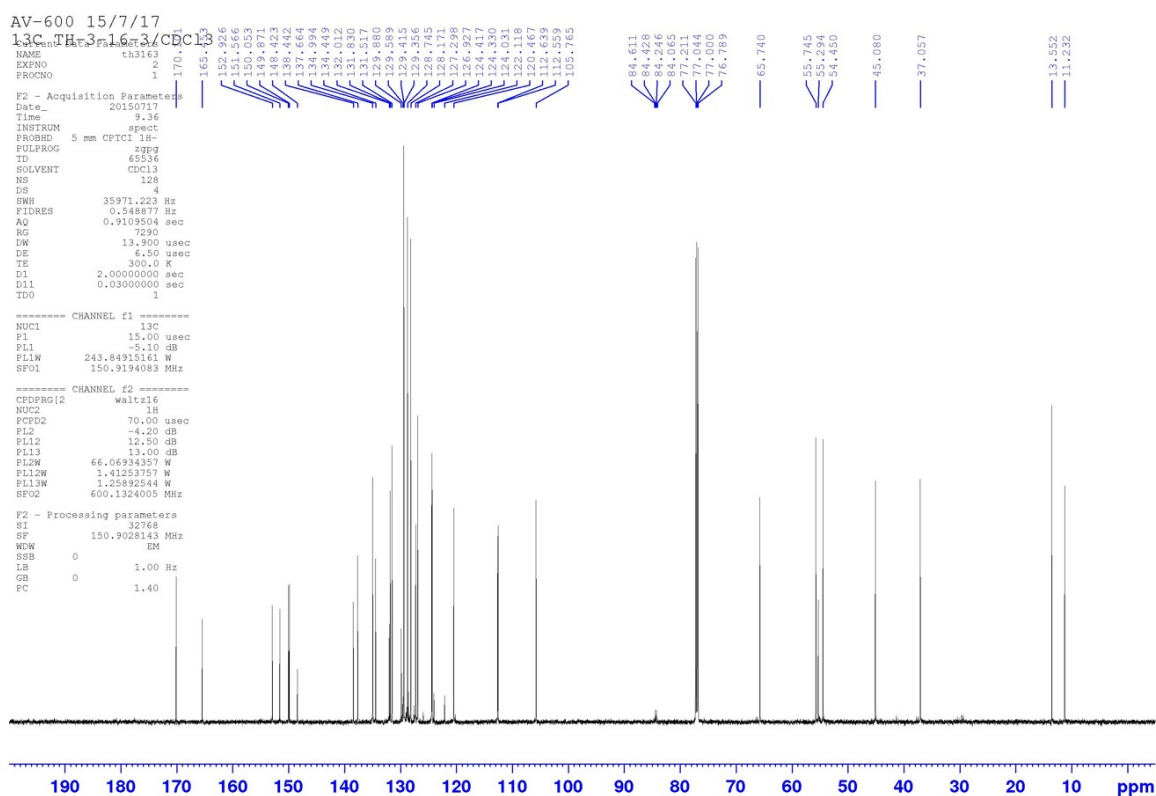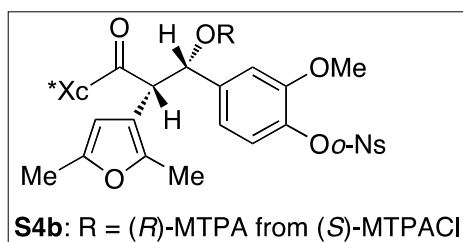



AV-600 15/7/21

1H TH-3-17-3/CDCl3

Current Data Parameters  
NAME th3173  
EXPNO 1  
PROCNO 1

F2 - Acquisition Parameters  
Date\_ 20150721  
Time 17.10  
INSTRUM spect  
PROBHD 5 mm CPTCI 1H-  
PULPROG zg30  
TD 65536  
SOLVENT CDCl3  
NS 16  
DS 2  
SWH 12376.237 Hz  
FIDRES 0.188846 Hz  
AQ 2.6476543 sec  
RG 18  
DW 40.400 usec  
DE 6.50 usec  
TE 300.0 K  
D1 1.00000000 sec  
TD0 1

===== CHANNEL f1 =====  
NUC1 1H  
P1 10.10 usec  
PL1 -4.00 dB  
PL1W 63.09573364 W  
SFO1 600.1337060 MHz

F2 - Processing parameters  
SI 32768  
SF 600.1300099 MHz  
WDW EM  
SSB 0  
LB 0.30 Hz  
GB 0  
PC 1.00

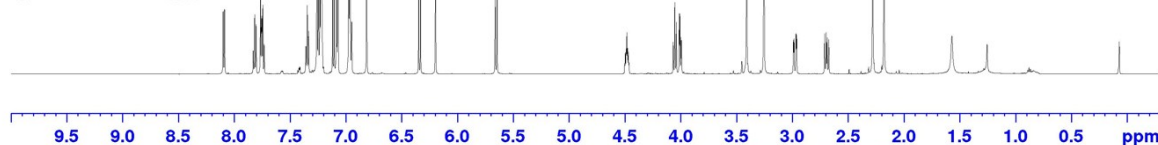

AV-600 15/7/17  
13C TH-3-17-3/CDCl3

Current Data Parameters  
NAME th3173  
EXPNO 1  
PROCNO 1

F2 - Acquisition Parameters  
Date\_ 20150721  
Time 17.14  
INSTRUM spect  
PROBHD 5 mm CPTCI 1H-  
PULPROG zgpg  
TD 65536  
SOLVENT CDCl3  
NS 128  
DS 4  
SWH 35971.223 Hz  
FIDRES 0.548877 Hz  
AQ 0.9109504 sec  
RG 7290  
DW 13.900 usec  
DE 6.50 usec  
TE 300.0 K  
D1 2.00000000 sec  
D11 0.03000000 sec  
TD0 1

===== CHANNEL f1 =====  
NUC1 13C  
P1 15.00 usec  
PL1 -5.10 dB  
PL1W 243.84915161 W  
SFO1 150.9194083 MHz

===== CHANNEL f2 =====  
CPDPRG2 waltz16  
NUC2 1H  
PCPD2 70.00 usec  
PL2 -4.20 dB  
PL12 12.50 dB  
PL13 13.00 dB  
PL12W 66.06934357 W  
PL12W 1.41253757 W  
PL13W 1.25892544 W  
SFO2 600.1324005 MHz

F2 - Processing parameters  
SI 32768  
SF 150.9028132 MHz  
WDW EM  
SSB 0  
LB 1.00 Hz  
GB 0  
PC 1.00

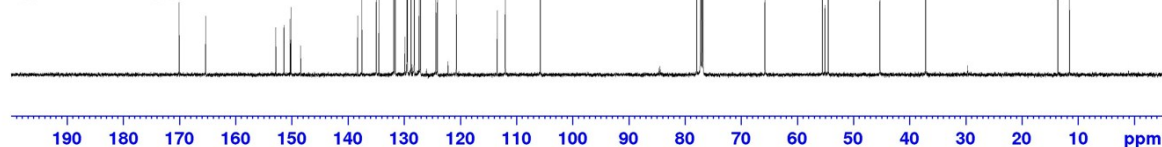

Supplement: c6qo00213g1.pdf [file c6qo00213g1.pdf]
